# Supplementary material for: Analysis of DNA-damage response to ionizing radiation in serum-shock synchronized human fibroblasts
Source: PubMed Central journal article supplement (PMC5493713; doi:10.1007/s10565-017-9394-9), 2017-05-03

**a**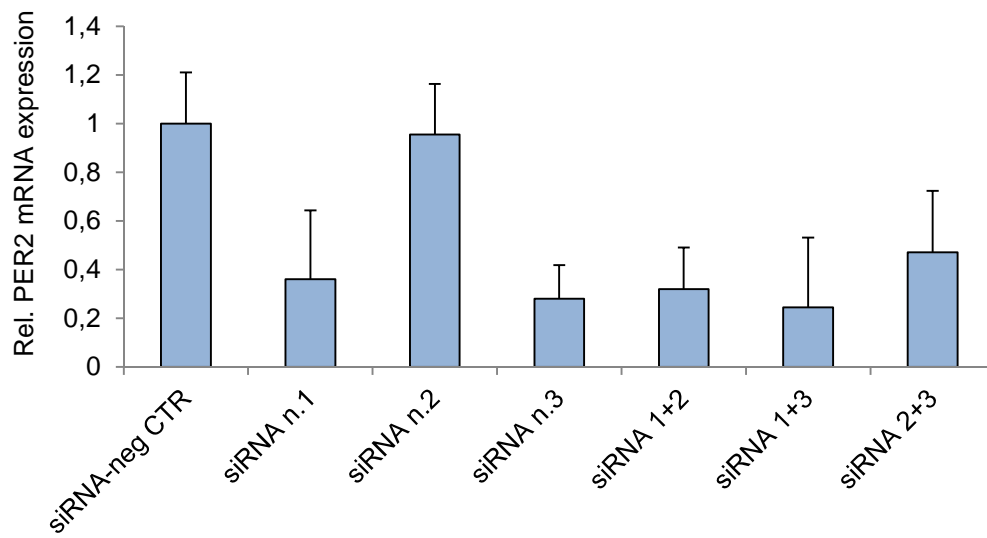**b**

siRNA n.1 **PER2HSS113092**

Sequence (5' to 3'): UCCAGUGGACAUGAGACCAACGAAA  
 Sequence (5' to 3'): UUUCGUUGGUCUCAUGUCCACUGGA

siRNA n.2 **PER2HSS113093**

Sequence (5' to 3'): GAUGUGGGCGUGUCCACAGUUUCA  
 Sequence (5' to 3'): UGAAACUGUGGAACACGCCCAUC

siRNA n.3 **PER2HSS189627**

Sequence (5' to 3'): GCGGCCUCCUAAACCUCCUGCUGAA  
 Sequence (5' to 3'): UUCAGCAGGAGGUUUAGGAGGCCGC

**c**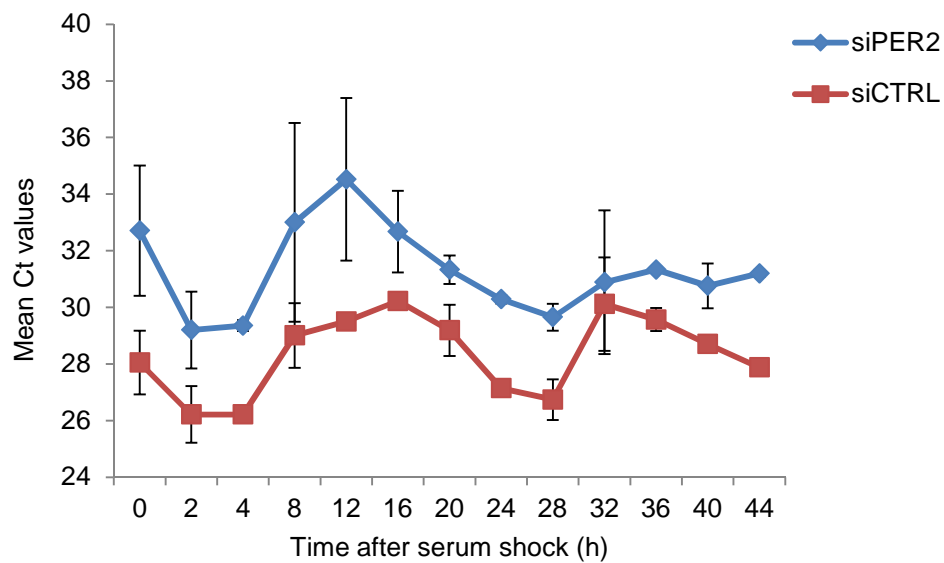

Supplement: 10565_2017_9394_MOESM2_ESM.pdf [file 10565_2017_9394_MOESM2_ESM.pdf]
