# Supplementary material for: Analysis of DNA-damage response to ionizing radiation in serum-shock synchronized human fibroblasts
Source: PubMed Central journal article supplement (PMC5493713; doi:10.1007/s10565-017-9394-9), 2017-05-03

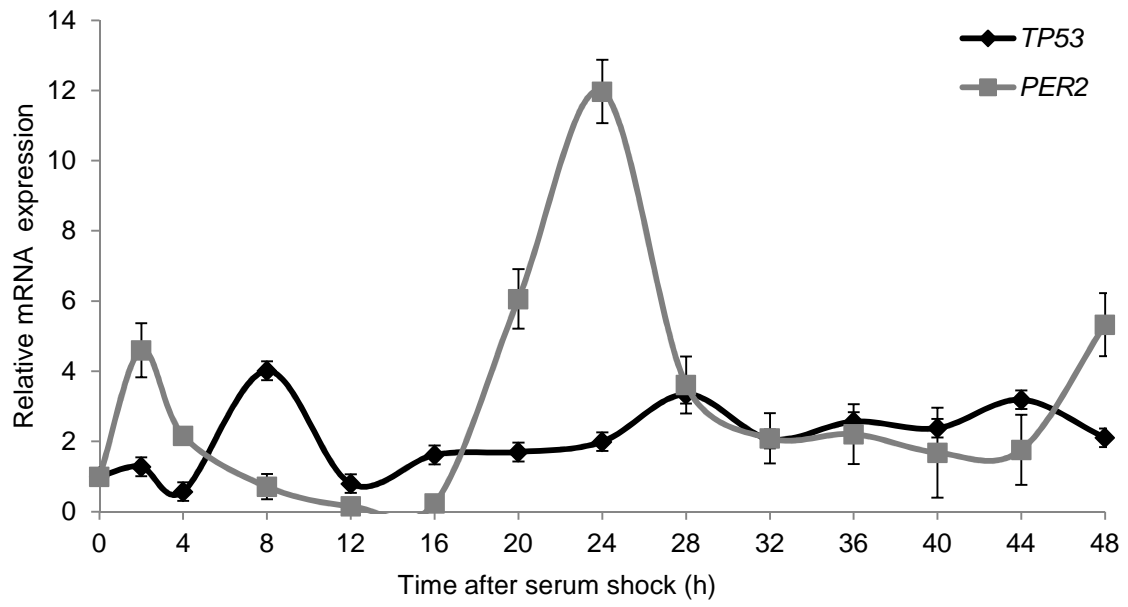

Supplement: 10565_2017_9394_MOESM4_ESM.pdf [file 10565_2017_9394_MOESM4_ESM.pdf]
